# Supplementary material for: Hedgehog signaling is controlled by Rac1 activity
Source: PubMed Central journal article supplement (PMC8771550; doi:10.7150/thno.67702), 2022-01-01
Supplement: thnov12p1303s1.pdf [file thnov12p1303s1.pdf]

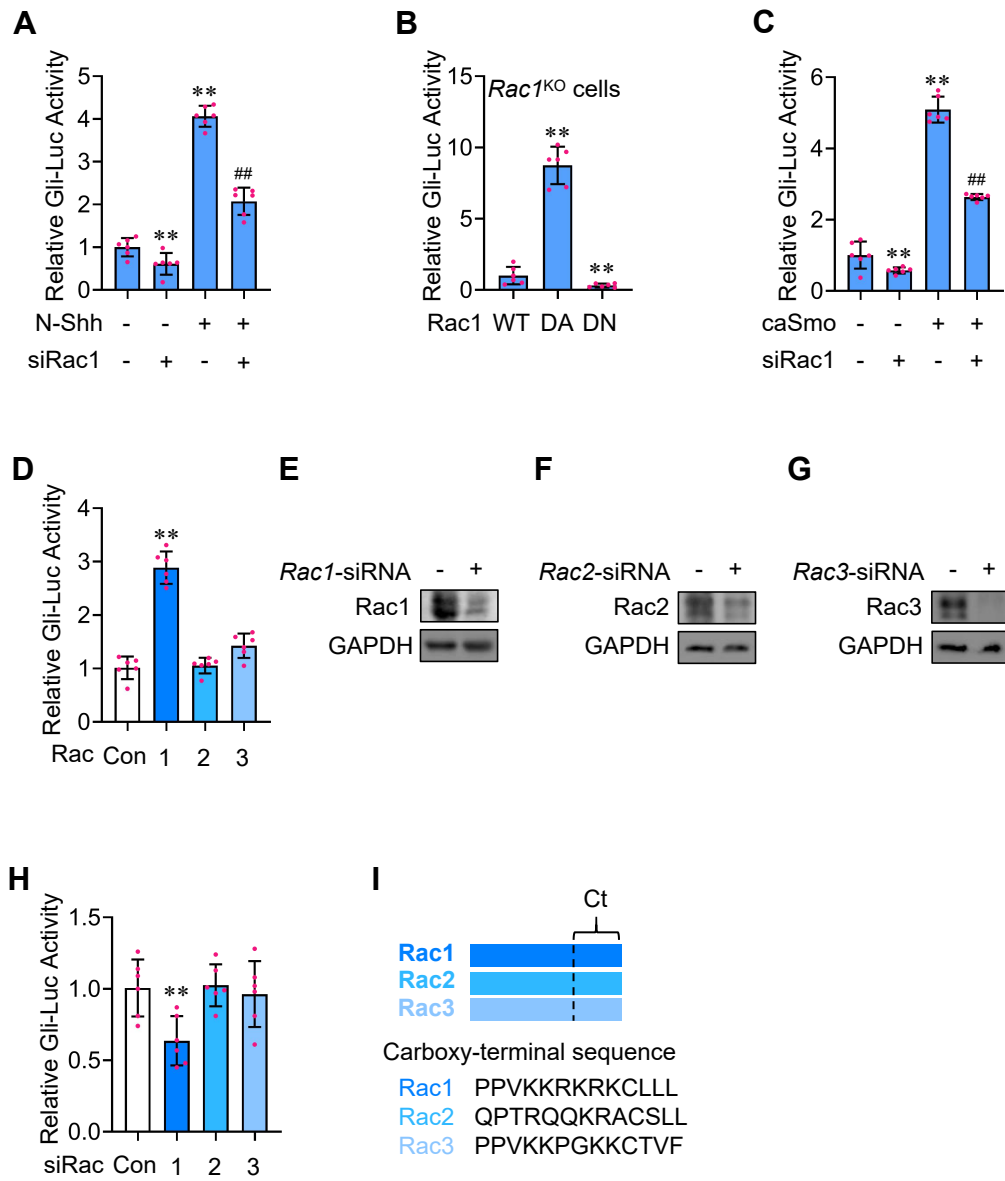

Figure S1

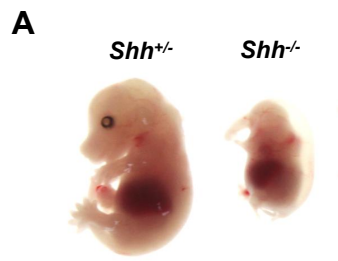

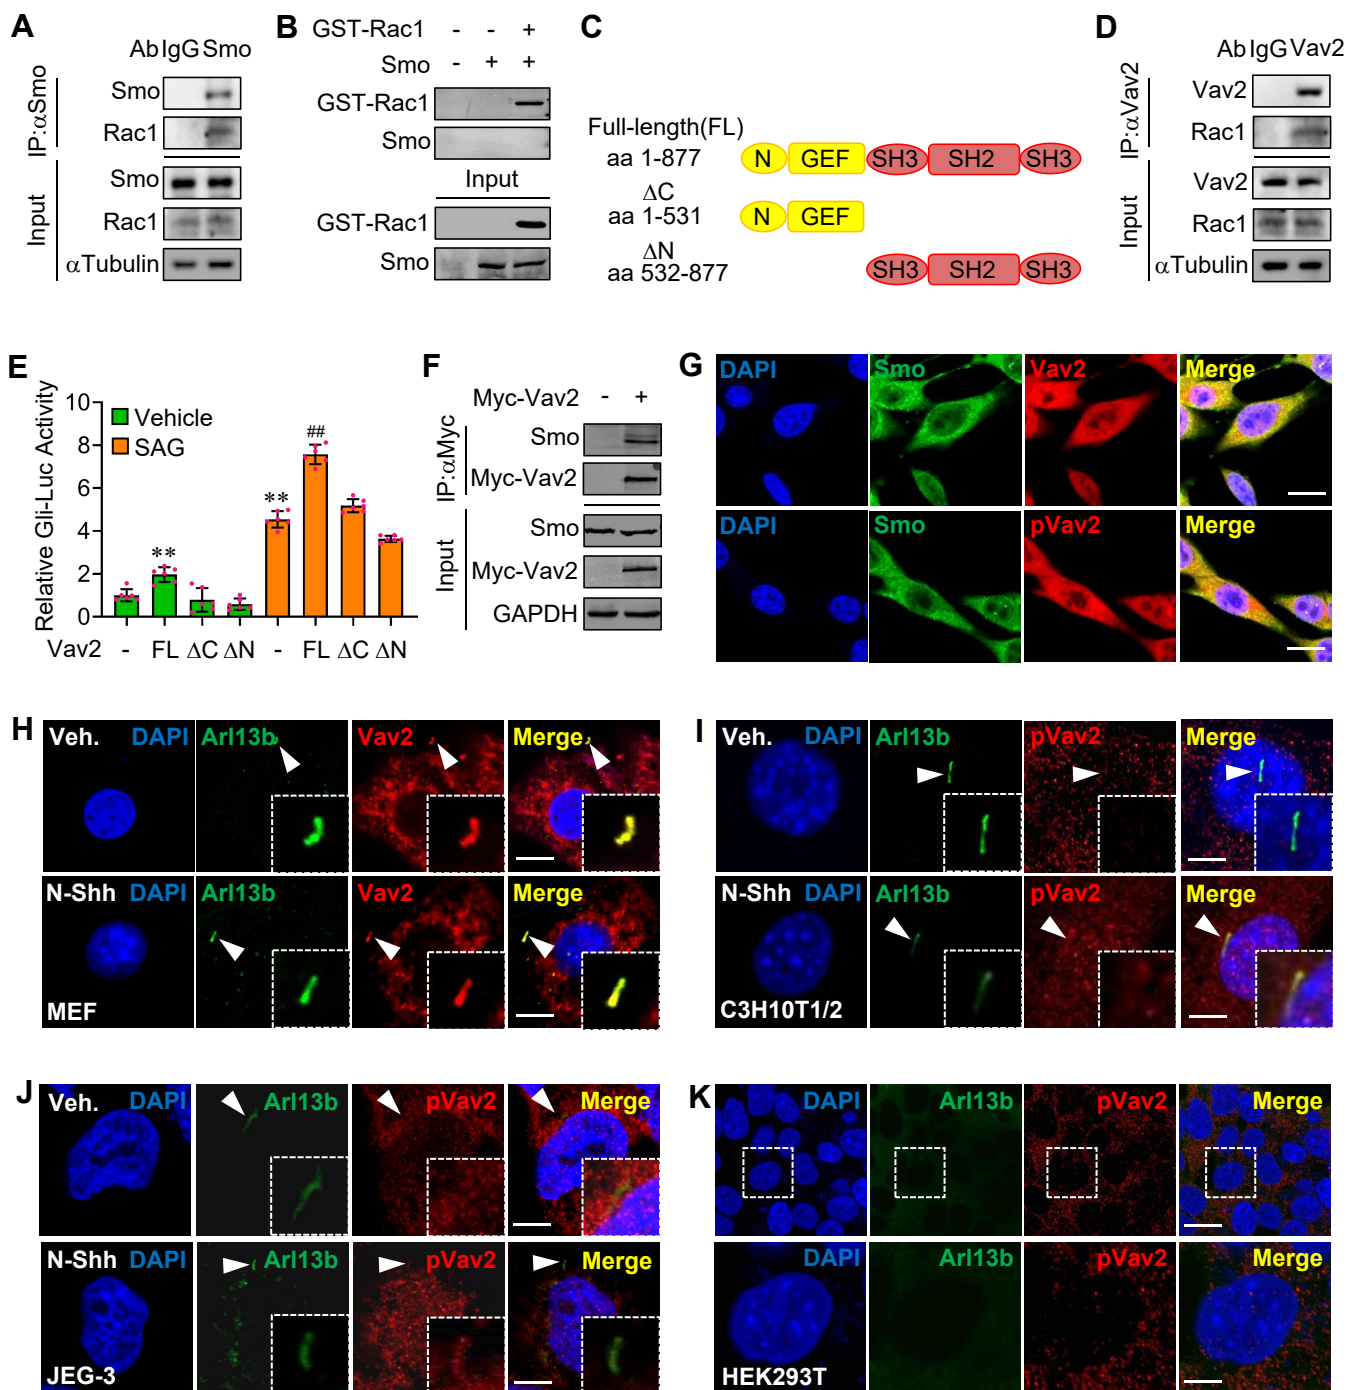

Figure S3

**A**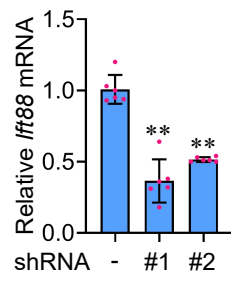**B**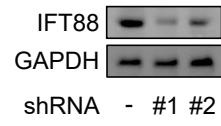

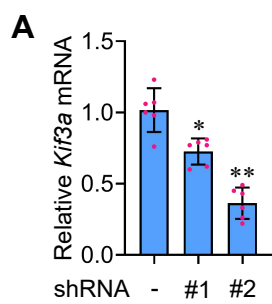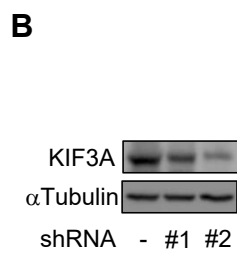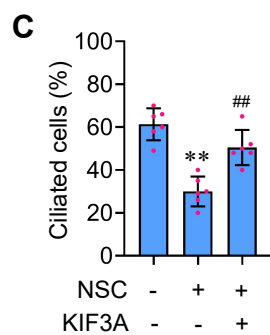

Figure S5

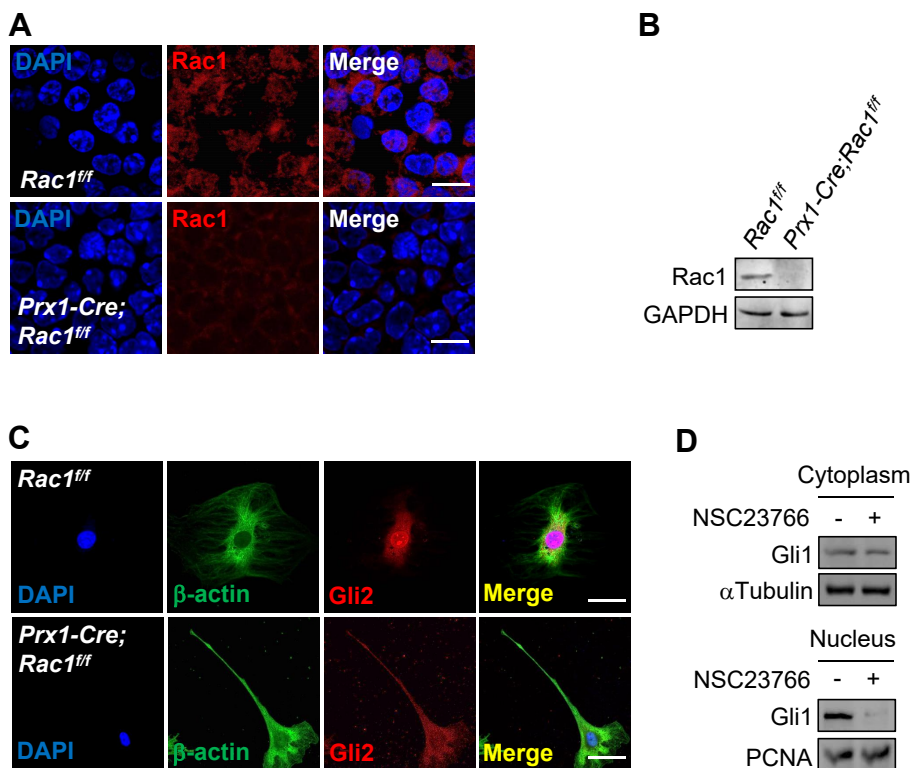

Figure S6

**Table S1 The primers for quantitative RT-PCR assays**

|              | Forward (5'-3')          | Reverse (5'-3')          |
|--------------|--------------------------|--------------------------|
| <i>Gli1</i>  | CCAAGCCAAC TTTATGTCAGGG  | AGCCCGCTTCTTTGTTAATTTGA  |
| <i>Ptch1</i> | CGGCAGCCGCGATAAG         | TTAATGATGCCATCTGCATCCA   |
| <i>Vav2</i>  | GTTTGACCCTTTTCGACCTCTTT  | ACACAGTCGTAGATGTCCTCA    |
| <i>Ift88</i> | TGGCCAACGACCTGGAGATTAACA | ATAGCTGCTGGCTTGGGCAAATTC |
| <i>Kif3a</i> | GAACAAGGTATCATCCCAAGGG   | GCAGTGCCAACTTCTAGCAGA    |
| <i>Gapdh</i> | TGGCCTCCGTGTTCTAC        | GAGTTGCTGTTGAAGTCGCA     |

**Table S2 The sequences for generating shRNA-expressing constructs**

|                      | Sense (5'-3')                                                           | Antisense (5'-3')                                                    |
|----------------------|-------------------------------------------------------------------------|----------------------------------------------------------------------|
| <b>Vav2 nt 240</b>   | CCGGTCCGGCTGAAAGTCTGCCACGATAAAC<br>TCGAGTTTATCGTGGCAGACTTTCAGTTTTTG     | AATTCAAAAACTGAAAGTCTGCCACGATAAAC<br>TCGAGTTTATCGTGGCAGACTTTCAGCCGGA  |
| <b>Vav2 nt 1095</b>  | CCGGTCCGGTTGGCGATGTACATCAATGAAC<br>TCGAGTTCATTGATGTACATCGCCAATTTTTG     | AATTCAAAAATTGGCGATGTACATCAATGAAC<br>TCGAGTTCATTGATGTACATCGCCAACCGGA  |
| <b>Ift88 nt 813</b>  | CCGGTCCGGGCCAAATAAGTCATTTACCAAC<br>TCGAGTTGGTAAATGACTTATTTGGCTTTTTG     | AATTCAAAAAGCCAAATAAGTCATTTACCAAC<br>TCGAGTTGGTAAATGACTTATTTGGCCCGGA  |
| <b>Ift88 nt 2381</b> | CCGGTCCGGGCCCTCAGATAGAAAGACCAA<br>CTCGAGTTGGTCTTTCTATCTGAGGGCTTTTT<br>G | AATTCAAAAAGCCCTCAGATAGAAAGACCAA<br>TCGAGTTGGTCTTTCTATCTGAGGGCCCGGA   |
| <b>Kif3a nt 698</b>  | CCGGTCCGGTGGAGTTTATGAATCAGCTAAC<br>TCGAGTTAGCTGATTCATAAACTCCATTTTTG     | AATTCAAAAATGGAGTTTATGAATCAGCTAAC<br>TCGAGTTAGCTGATTCATAAACTCCACCGGA  |
| <b>Kif3a nt 1051</b> | CCGGTCCGGAGGGATCAGAATAAATACAAAC<br>TCGAGTTTGTATTTATTCTGATCCCTTTTTG      | AATTCAAAAAAGGGATCAGAATAAATACAAAC<br>TCGAGTTTGTATTTATTCTGATCCCTCCCGGA |
